# Supplementary material for: Reduction of NOx on metal-free hydrogenated hexagonal boron nitride
Source: Royal Society of Chemistry journal article supplement (doi:10.1039/d4cy00206g), 2024-01-01
Supplement: d4cy00206g1.pdf [file d4cy00206g1.pdf]

Cite this: DOI: 00.0000/xxxxxxxxxx

## Supplementary information for reduction of NO<sub>x</sub> on metal-free hydrogenated hexagonal boron nitride.<sup>†</sup>

Anthony J. R. Payne<sup>a</sup>, Neubi F. Xavier Jr<sup>a</sup> and, Marco Sacchi<sup>a</sup>.

Received Date

Accepted Date

DOI: 00.0000/xxxxxxxxxx

To compare the results of our approach to the literature, we consider the work of Surya et al.<sup>1</sup> **Table S1** compares the formation energies of V<sub>N</sub> and 1-3HV<sub>N</sub> and shows excellent agreement with the exception of 2HV<sub>N</sub>. Here, we explored geometries where hydrogen is positioned on the same side of the hBN plane and on alternate sides of the plane and found an  $E_f$  of 7.29 eV and 6.86 eV for hydrogen atoms on the same side and opposite sides of the plane, respectively. This discrepancy in energy can be explained by the greater steric hindrance of hydrogens on the same side of the plane, reducing the stability of the 2HV<sub>N</sub> vacancy. **Figure S1** shows two of the geometries of the 2HV<sub>N</sub> vacancy.

| System                             | This study | Surya et. al. <sup>1</sup> |
|------------------------------------|------------|----------------------------|
| V <sub>N</sub>                     | 8.63       | 8.69                       |
| 1HV <sub>N</sub>                   | 6.93       | 6.94                       |
| 2HV <sub>N</sub> (H Same side)     | 7.29       | 7.38                       |
| 2HV <sub>N</sub> (H opposite side) | 6.86       | -                          |
| 3HV <sub>N</sub>                   | 5.29       | 5.27                       |

Table S1: Formation energies (eV) of V<sub>N</sub> and 1-3HV<sub>N</sub> vacancies.

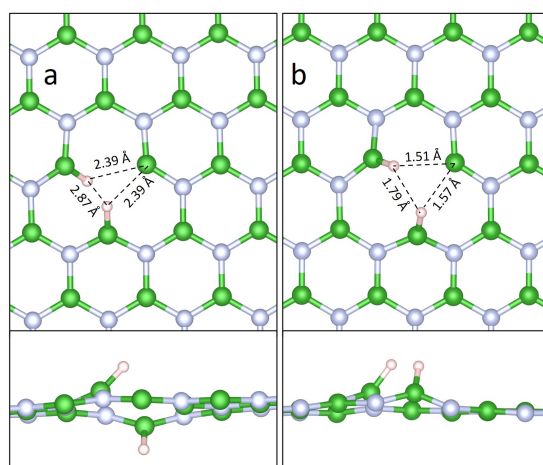

Fig. S1 Geometries of the 2HV<sub>N</sub> vacancy, (a) 2HV<sub>N</sub> with Hydrogen atoms on opposite sides of the hBN plane with an  $E_f$  of 6.86 eV and (b) 2HV<sub>N</sub> with Hydrogen atoms on the same side of the hBN plane with an  $E_f$  of 7.29 eV.

E-mail: m.sacchi@surrey.ac.uk, apayne@surrey.ac.uk

<sup>a</sup> Department of Chemistry, University of Surrey, Guildford, GU2 7XH, UK.

The Gibbs free energy ( $G$ ) was determined utilising the fundamental equation  $G = H - TS$ , where  $S$  represents entropy, and  $H$  is the enthalpy.  $H$  includes the DFT energy at 0 K, the zero-point energy correction, and the thermal contributions from translational, rotational, and vibrational energy changes to the internal energy ( $U$ ).  $S$  consists of rotational, translational, and vibrational entropy, calculated using partition functions. For gas-phase species, the translational and rotational contributions are added according to the ideal gas statistical thermodynamic laws, whereas for the solid-phase species, only the vibrational contributions are considered.  $G$  was then used to calculate the Gibbs free energy of formation ( $G_f$ ) for using the equation:

$$G_f = G_V - G_{hBN} + \frac{1}{2}n_N G_{N_2} + n_B G_B - \frac{1}{2}n_H G_{H_2} \quad (1)$$

The  $G_f$  for the defect structures discussed in the main text are presented in **Figure S2**. Notably, the  $G_f$  increases with temperature for defects containing a higher number of hydrogen atoms. Among the vacancies investigated,  $3HV_B$  is the most stable defect across the temperature range from 25 K to 1000 K, followed by  $2HV_B$ . Both  $3HV_N$  and  $N_B$  show a similar trend, with  $G_f$  increasing with temperature. In contrast, the  $G_f$  of  $1HV_N$  slightly decreases with temperature, reaching a value of 6.64 eV at 1000 K, comparable to that of  $3HV_N$  and  $N_B$ . At lower temperatures,  $1HV_B$  and  $2HV_N$  have similar  $G_f$  values, but as temperature increases, the  $G_f$  of  $2HV_N$  rises, whilst for  $1HV_B$   $G_f$  falls. The  $G_f$  of  $V_N$  decreases with temperature, becoming lower than that of  $2HV_N$  at temperatures above 938 K.  $V_B$  has the highest  $G_f$  throughout the temperature range, making it the least stable defect. Generally, defects with fewer hydrogen atoms experience a decrease in  $G_f$  with temperature, whereas defects with more hydrogen atoms increase. This trend is attributed to the significant increase in entropy for  $\frac{1}{2}H_2$  compared to the hydrated defect. Overall, the stability order of defects aligns with their formation energy  $E_f$ , with  $3HV_B$  emerging as the most stable defect from 25 K to 1000 K.

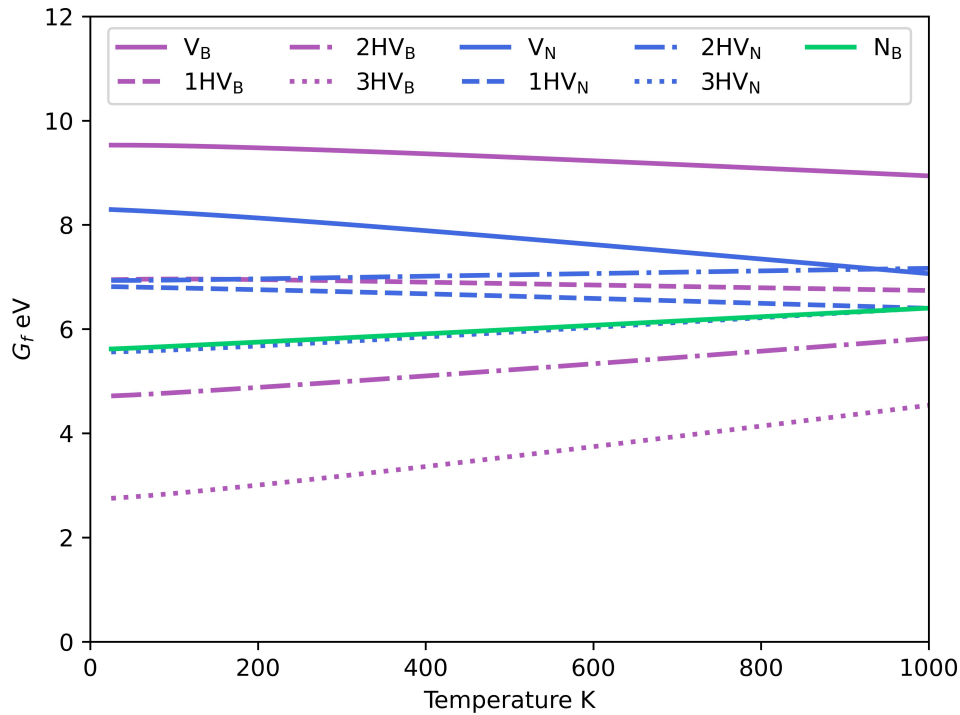

Fig. S2 Variation in Gibbs free energy of formation ( $G_f$ ) with temperature for hBN defect structures.

In addition to temperature, partial pressures of gas-forming species influence  $G_f$ . The effect is captured by rewriting Equation 1 as follows:

$$G_f = G_V - G_{hBN} + \frac{1}{2}n_{N_2} \left( G_{N_2} + k_B T \ln \left( \frac{p_{N_2}}{p_0} \right) \right) + n_B G_B - \frac{1}{2}n_{H_2} \left( G_{H_2} + k_B T \ln \left( \frac{p_{H_2}}{p_0} \right) \right) \quad (2)$$

Where  $p_{N_2}$ ,  $p_{H_2}$  is the partial pressure of  $N_2$  and  $H_2$ , respectively.  $p_0$  is a reference pressure.  $G$  values were selected for temperatures of 298 K and 1000 K with  $p_0$  of 1 bar and 10 bar such that  $p_0 = p_{N_2} + p_{H_2}$ ; results are shown in Figure S3. The  $G_f$  of hydrogen-containing defects show a slight downward trend with increasing  $p_{H_2}$  at low  $p_{H_2}$  ranges. Furthermore, vacant nitrogen defects show a slight downward curvature with increasing  $p_{H_2}$  at high  $p_{H_2}$  ranges. In the middle of the range of  $p_{H_2}$ , the  $G_f$  remains quite constant. The

overall effect leads to a slight decrease in  $G_f$  with increasing  $p_{H_2}$  and, therefore, higher stability. The  $G_f$  exhibits greater variation at 1000 K than 298 K, with  $3HV_N$  having a greater  $G_f$  than  $N_B$  at low  $p_{H_2}$ , with the 10 bar case compounding the effect. Despite the effect of pressure, the order of defect stability is largely unchanged, with  $3HV_B$  remaining the most stable defect structure with the lowest  $G_f$ .

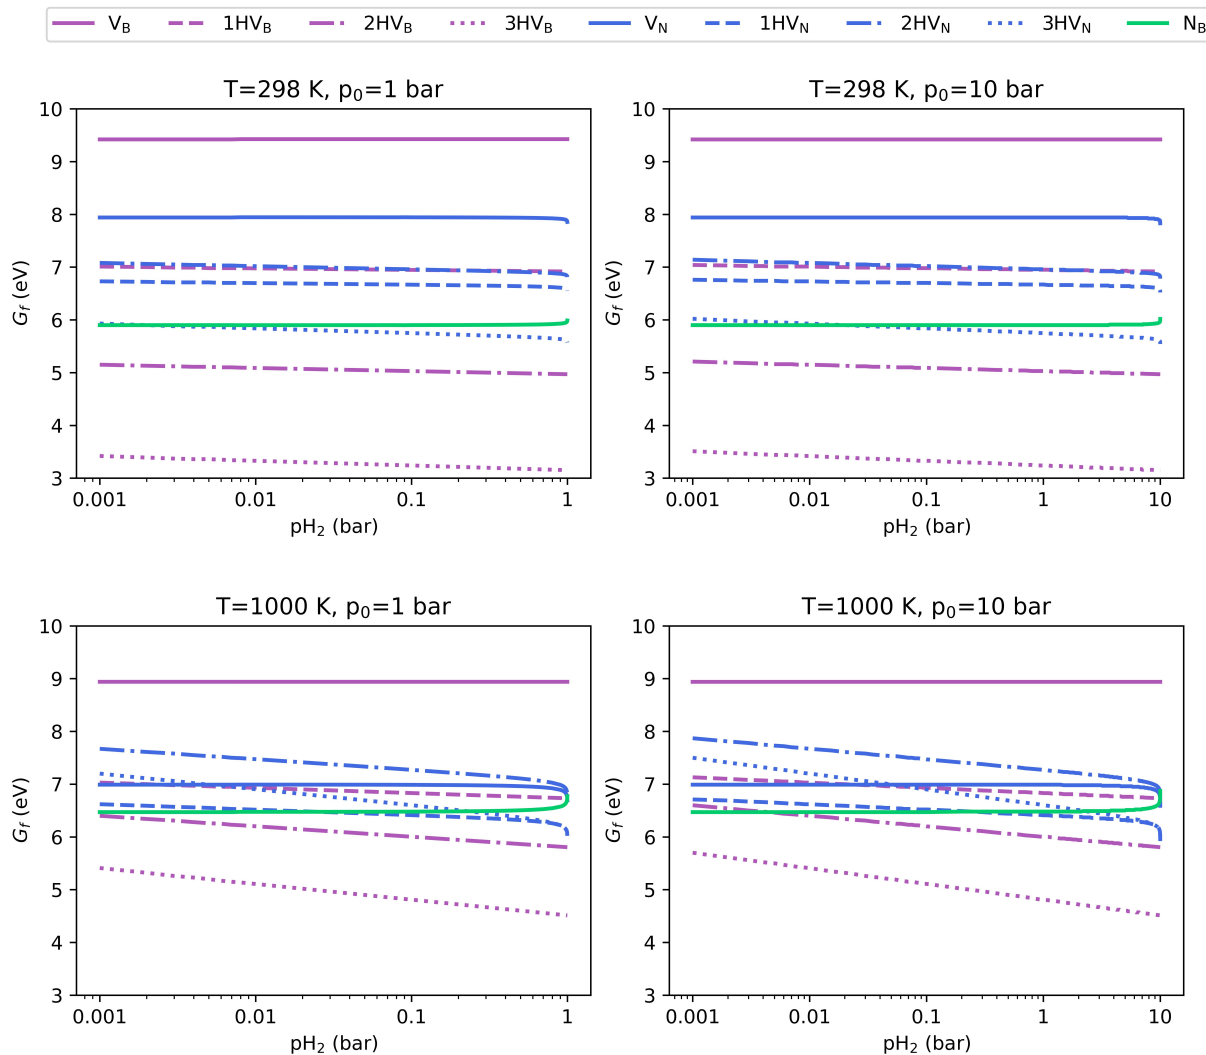

Fig. S3 Variation in Gibbs free energy of formation ( $G_f$ ) with  $H_2$  partial pressure ( $p_{H_2}$ ) for hBN defect structures at 298 K and 1000 K.

### 0.1 Adsorption sites and reaction steps

The global minimum adsorption site for  $NO_2$  was determined using the following approach. Single point energies were calculated for  $NO_2$  in orientations and sites as shown in **Figure S4** for a range of heights from 2 Å to 4.5 Å above the hBN surface. The minimum energy structure at each position was then geometry optimised to find the adsorption energy with the minimum energy configuration shown in 2 of the main text. A similar procedure was used to identify the adsorption positions and orientation of  $NO_2$  and  $NO$  above  $3HV_B$  as illustrated in **Figure S4**.

The optimal adsorption site for  $NO_2$  was determined through the following methodology. Initial single-point energy calculations were conducted for  $NO_2$  across the orientations and sites depicted in **Figure S4**, with the molecule positioned at heights ranging from 2 Å to 4.5 Å above the hBN surface. The structures with the lowest energy at each position underwent geometry optimisation to ascertain the adsorption energy, ultimately leading to the determination of the minimum energy configuration, as illustrated in Figure 2 of the main text. A similar approach was employed to identify the adsorption positions and orientations of  $NO_2$  and  $NO$  atop  $3HV_B$ , with sites and orientations shown in **Figure S4**.

Alternate reaction pathways for the reaction of  $NO_2$  on  $3HV_B$  were explored. Initiation of the hydrogen transfer step from  $3HV_B$  to  $NO_2$  to create a  $NO_2H$  intermediate ( $TS2$ ,  $3HV_B \rightleftharpoons NO_2H$ ) with  $NO_2$  originating from different adsorption sites and orientations.

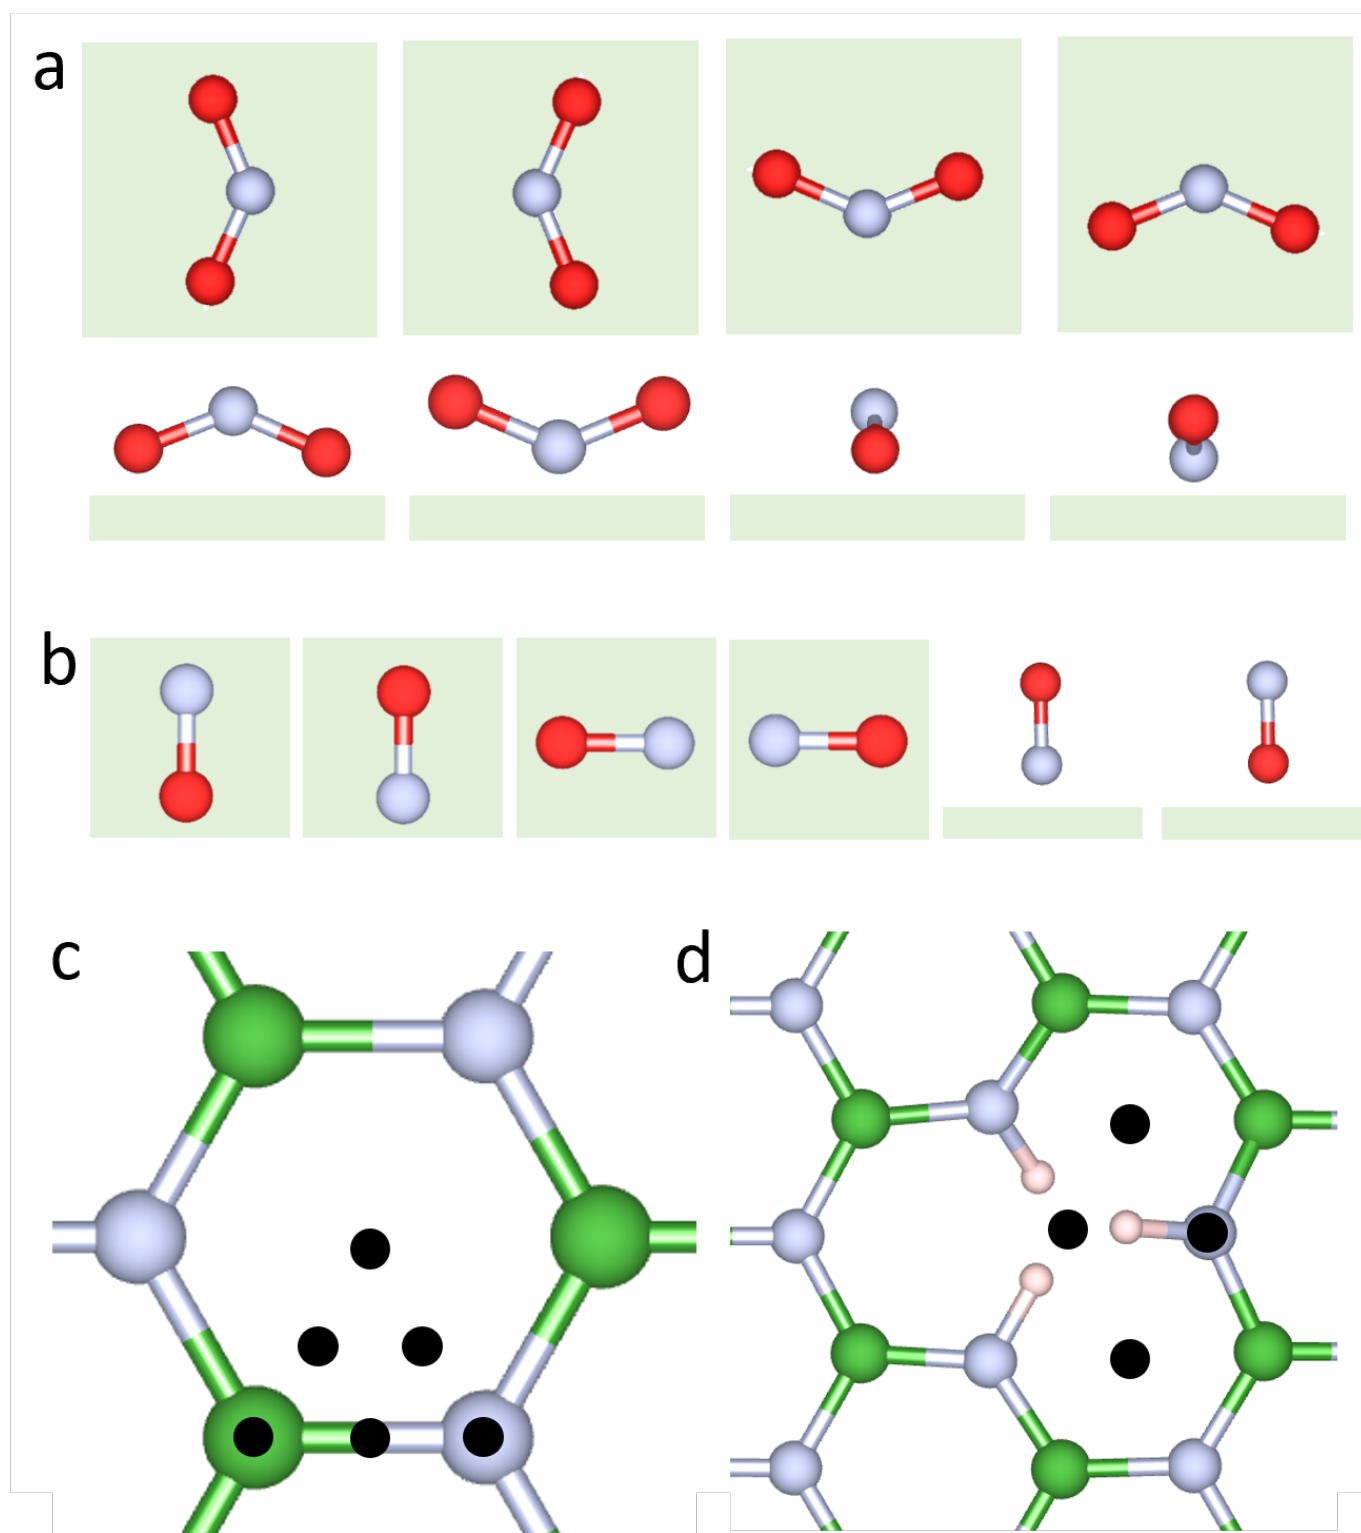

Fig. S4 (a) and (b) illustrate the orientations of NO<sub>2</sub> and NO above the hBN/3HVB surface sites shown in (c)/(d). These orientations and sites are initially considered in the single-point energy calculations.

However, these attempts yielded higher energy barriers ( $>1.20$  eV) compared to those presented in the main text. Combining TS3 and TS4 into a single step resulted in a slightly elevated energy barrier of 0.77 eV with geometry optimisation of the transition state, revealing a structure neither resembling the reactant nor the product, indicating the existence of a metastable rotation intermediate. As an alternative to TS5 (barrier of 0.96 eV), we explored breaking the N-OH bond to yield a hydroxyl group bound to the surface boron adjacent to the remaining NO ( $\text{NO}_2\text{H} \rightleftharpoons \text{NO} + \text{OH}$ ). Subsequent steps involved moving the hydroxyl group closer to a surface H,

followed by the formation of H<sub>2</sub>O. Despite the low barrier to breaking the N-OH bond (0.25 eV), the subsequent steps presented barriers of 1.16 eV and 1.27 eV. Further iterations to form the N<sub>B</sub> site and produce the first water molecule also resulted in multistep reactions with large barriers. Consequently, TS5, with a single barrier of 0.96 eV, is the minimum energy pathway. Following the production of a water molecule, the resulting geometry offered fewer possible alternative routes and pathways to form the N<sub>B</sub> site. Unlike NO<sub>2</sub> reaction, hydrogen transfer from 3V<sub>B</sub> to NO form a physisorbed HNO species results in a metastable geometry with an energy of 2.20 eV; therefore, the chemisorption of NO occurs in a single step (TS11).

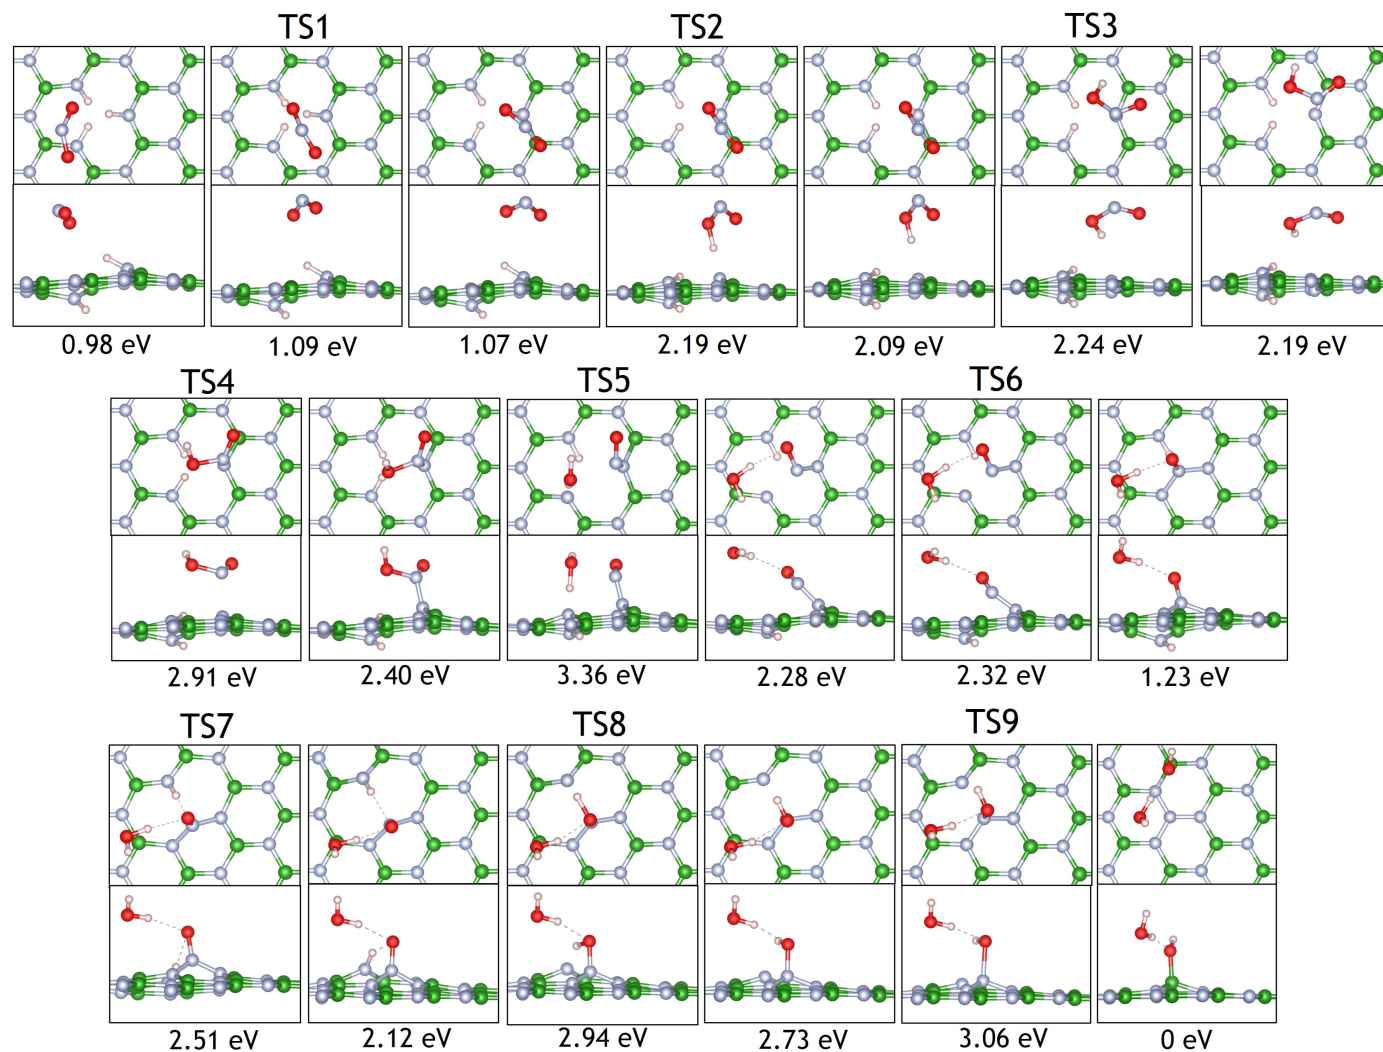

Fig. S5 Structures along the reaction coordinate for the reaction of NO<sub>2</sub> with 3HV<sub>B</sub>. Transition states are labelled TS1-9. The product of the reaction, a nitrogen antisite adjacent to a boron site with a hydroxyl group, is used as the reference energy.

## 0.2 Details of the microkinetic modelling

Kinetics simulations for the mechanism of NO<sub>2</sub> conversion into products were performed using MKMCXX.<sup>2</sup> The non-activated adsorption rate constant for the adsorbed NO<sub>2</sub> was calculated using Hertz-Knudsen kinetics (Equation 3 in the main text) with the surface area determined by the hydrogen atoms of the 3HV<sub>B</sub> vacancy. The rate constants of the surface reaction steps with discrete transition states were calculated according to transition state theory in (Equation 4 in the main text), with Arrhenius parameters shown in **Table S2**. The combination of Hertz-Knudsen kinetics and transition state theory in microkinetic models has been successfully adopted in previous works.<sup>3-6</sup> As the barriers of TS1 and TS3 are negligible at higher temperatures, we decided to combine the TS1, TS2 and TS3 in a single step. A simulation time of 10000 s was set to allow for steady-state convergence, and the maximum absolute and relative tolerances were set to  $1 \times 10^{-16}$ . Reaction rates were then calculated as a function of temperature and are shown in the main text.

**Figure S6** shows the effect of pressure on the consumption rate of NO<sub>2</sub> and H<sub>2</sub>O production. Here, we can see the peak conversion rate occurs at decreasing temperatures as the pressure increases. As the pressure increases, higher coverages of NO<sub>2</sub> are achieved

| Label     | Arrhenius coefficient ( $s^{-1}$ ) |          | Activation energy (eV) |         |
|-----------|------------------------------------|----------|------------------------|---------|
|           | Forward                            | Reverse  | Forward                | Reverse |
| TS1 - TS3 | 2.26E+13                           | 6.11E+12 | 1.22                   | 0.05    |
| TS4       | 1.32E+12                           | 2.26E+13 | 0.70                   | 0.47    |
| TS5       | 1.19E+14                           | 3.17E+12 | 0.75                   | 0.92    |
| TS6       | 1.79E+13                           | 1.01E+14 | 0.04                   | 1.08    |
| TS7       | 2.19E+13                           | 6.84E+13 | 1.31                   | 0.42    |
| TS8       | 2.97E+13                           | 2.84E+12 | 0.71                   | 0.09    |
| TS9       | 2.18E+13                           | 1.60E+13 | 0.28                   | 3.04    |
| TS10      | 4.03E+12                           | 3.02E+11 | 0.25                   | 1.52    |

Table S2: Parameters for the elementary reactions involved in the microkinetic modelling of the reaction of  $\text{NO}_2$  with  $3\text{HV}_B$ .

at lower temperatures per the adsorption isotherms,<sup>7</sup> therefore, the peak rate of  $\text{NO}_2$  and  $\text{H}_2\text{O}$  production occurs at lower temperatures with increased pressure. The model has no competing reactions; therefore, the number of surface sites limits the rate of  $\text{NO}_2$  consumption to  $3.68 \times 10^{-5} s^{-1}$  when assuming a 1:1 ratio of  $\text{NO}_2$  to  $3\text{HV}_B$  sites.

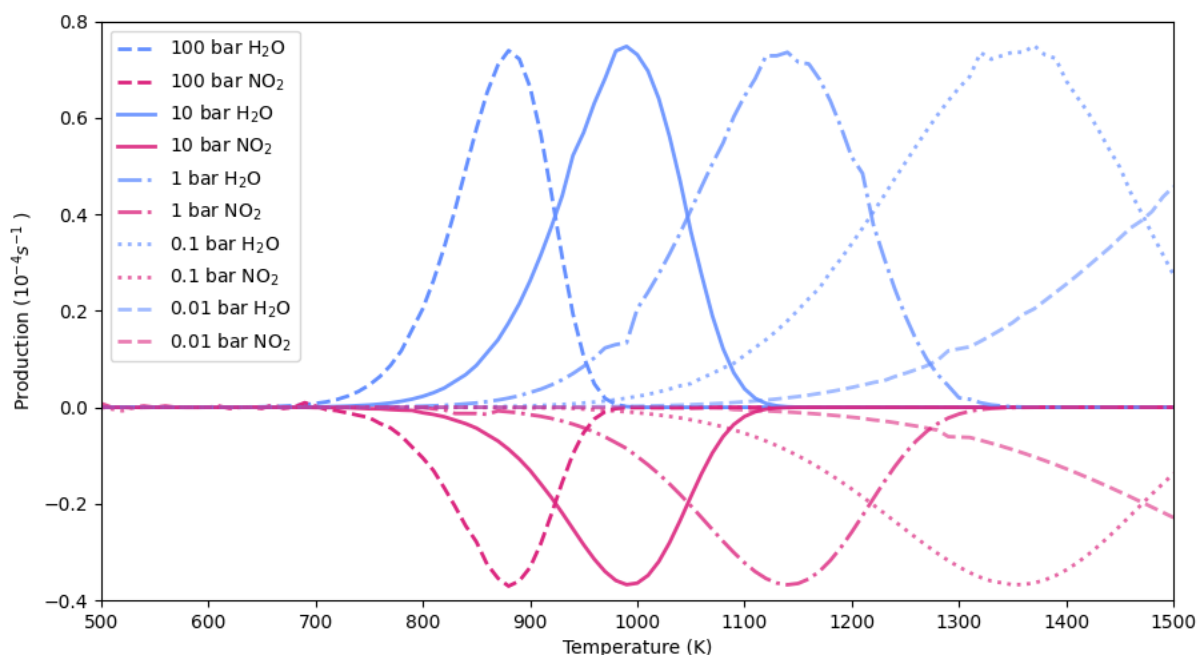

Fig. S6 The effect of pressure on the rate of  $\text{NO}_2$  consumption and  $\text{H}_2\text{O}$  production at different temperatures. The rates reach their maximum at 880 K, 990 K, 1140 K and 1370 K for pressures of 100, 10, 1, 0.1 and 0.01 bar, respectively.

### 0.3 Formation of hydrogenated $V_B$ defects

In order to confirm the likelihood of the formation of hydrogenated  $V_B$  defects when exposed to hydrogen, the reaction of  $\text{H}_2$  with  $1\text{HV}_B$  and  $2\text{HV}_B$  was investigated. **Figure S7a** shows the reaction of  $1\text{HV}_B$  with  $\text{H}_2$ . Physisorbed  $\text{H}_2$  is dissociated into two separate H atoms, overcoming an energy barrier of 1.47 eV, forming N-B bonds. The surface hydrogen atoms undergo a subsequent rearrangement step to find the minimum energy  $3\text{HV}_B$  configuration. The overall reaction has a  $\Delta E$  of -4.77 eV. Given the high barrier for the reverse reaction (5.98 eV), the reverse reaction is unlikely even at high temperatures. The reaction of  $2\text{HV}_B$  with  $\text{H}_2$  is shown in **Figure S7b**, here  $\text{H}_2$  is dissociated to form a  $3\text{HV}_B$  with a hydrogen atom adsorbed onto an adjacent boron site. This reaction has a barrier of 0.92 eV and may provide a source of hydrogen atoms on the surface for reactions such as TS10 of the main text.

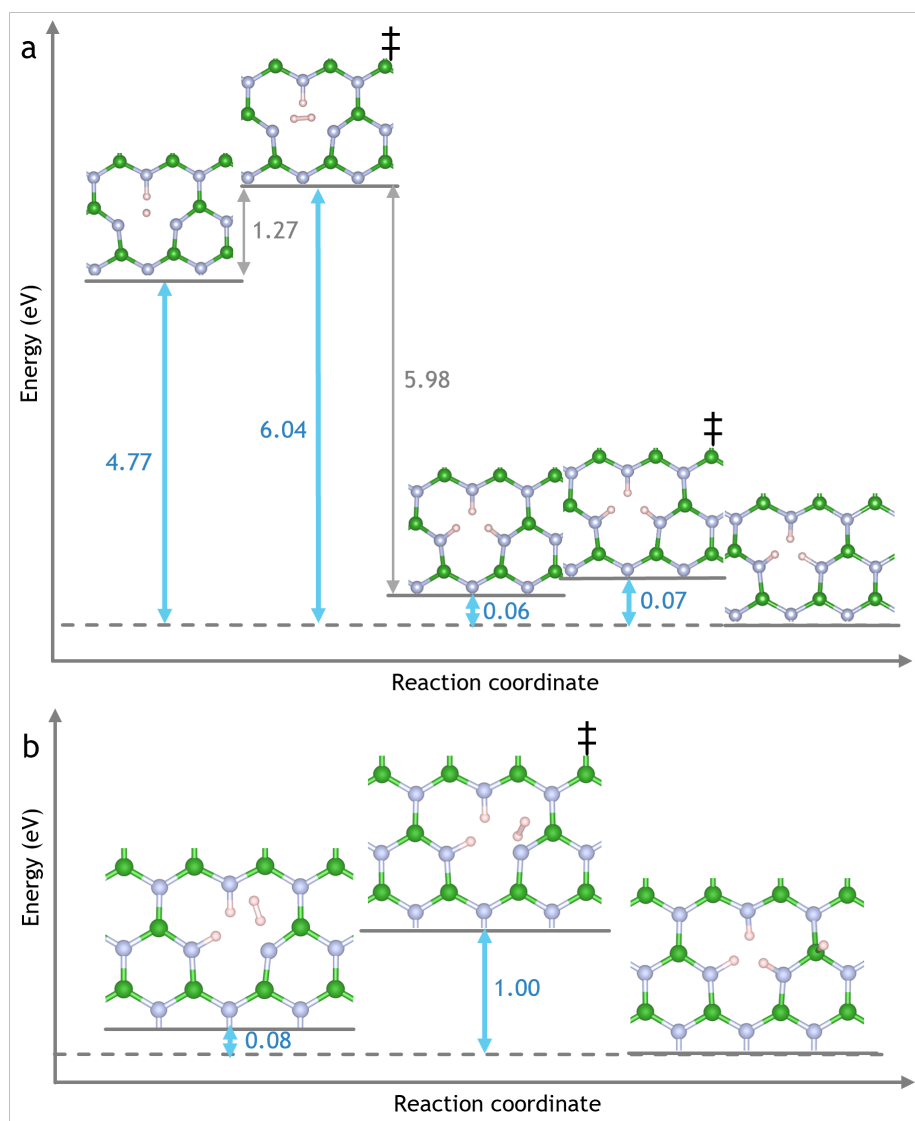

Fig. S7 (a) The reaction of  $1\text{HVB}$  with  $\text{H}_2$ , the product of the reaction is a  $3\text{HVB}$ , the reaction has a  $\Delta E$  of  $-4.77$  eV with a transition state barrier of  $1.27$  eV. (b) The reaction of  $2\text{HVB}$  with  $\text{H}_2$ , the product of the reaction is a  $3\text{HVB}$  with a hydrogen atom adsorbed onto an adjacent boron site.

## Notes and references

- 1 V. Surya, K. Choutipalli, K. Esackraj and E. Varathan, *Applied Surface Science*, 2022, **602**, 15.
- 2 I. A. Filot, R. A. Van Santen and E. J. Hensen, *Angewandte Chemie - International Edition*, 2014, **53**, 12746–12750.
- 3 N. F. Xavier, G. F. Bauerfeldt and M. Sacchi, *ACS Applied Materials and Interfaces*, 2023, **15**, 6951–6962.
- 4 H. Ma and W. F. Schneider, *ACS Catalysis*, 2019, **9**, 2407–2414.
- 5 Z. Lian, C. Si, F. Jan, M. Yang and B. Li, *ACS Catalysis*, 2020, **10**, 14006–14014.
- 6 L. Foppa, M.-C. Silaghi, K. Larmier and A. Comas-Vives, *Journal of Catalysis*, 2016, **343**, 196–207.
- 7 G. Attard and C. Barnes, *Surfaces (Oxford Chemistry Primer)*, 1998.
